# Supplementary material for: Polyhydroxyalkanoates: the natural biopolyester for future medical innovations
Source: Royal Society of Chemistry journal article supplement (doi:10.1039/d3bm01043k), 2023-01-01
Supplement: d3bm01043k1.pdf [file d3bm01043k1.pdf]

## **Polyhydroxyalkanoates: The Natural Biopolyester for Future Medical Innovations**

Zi-Wei Ren<sup>1,#</sup>, Ze-Yu Wang<sup>1,#</sup>, Yan-Wen Ding<sup>1,#</sup>, Jin-Wei Dao<sup>1,3</sup>, Hao-Ru Li<sup>1</sup>, Xue Ma<sup>1</sup>, Xin-Yu Yang<sup>1</sup>, Zi-Qi Zhou<sup>1</sup>, Jia-Xuan Liu<sup>1</sup>, Chen-Hui Mi<sup>1</sup>, Zhe-Chen Gao<sup>2</sup>, Hua Pei<sup>4\*</sup> Dai-Xu Wei<sup>1,2,4,5\*</sup>

<sup>1</sup>Key Laboratory of Resource Biology and Biotechnology in Western China, Ministry of Education, School of Medicine, Department of Life Sciences and Medicine, Northwest University, Xi'an, 710069, China

<sup>2</sup>Department of Orthopedics, Tongren Hospital, Shanghai Jiao Tong University, Shanghai, 200336, China

<sup>3</sup>Dehong Biomedical Engineering Research Center, Dehong Teachers' College, Dehong, 678400, China

<sup>4</sup>Department of Clinical Laboratory, The Second Affiliated Hospital, Hainan Medical University, Haikou, 570311, China

<sup>5</sup>Shaanxi Key Laboratory for Carbon Neutral Technology, Xi'an, 710069, China

# Zi-Wei Ren, Ze-Yu Wang and Yan-Wen Ding contributed equally to this work.

\*Correspondence: Dai-Xu Wei, weidaixu@nwu.edu.cn;

Key Laboratory of Resource Biology and Biotechnology in Western China, Ministry of Education, School of Medicine, Department of Life Sciences and Medicine, Northwest University, Xi'an, 710069, China

Table S1. Biosynthesis and productivity of PHAs via natural microorganism.

| PHAs                     | Microorganisms                             | Carbon source                                                       | PHA content (%) | Average PHA productivity (g L <sup>-1</sup> h <sup>-1</sup> ) | Refs   |
|--------------------------|--------------------------------------------|---------------------------------------------------------------------|-----------------|---------------------------------------------------------------|--------|
| PHB                      | <i>Azohydromonas lata</i>                  | Sucrose                                                             | 50.0–88.0       | 0.050–4.940                                                   | 1-3    |
|                          | <i>Azohydromonas lata</i>                  | Fructose, glucose                                                   | 76.5–79.4       | 0.121–0.128                                                   | 4      |
|                          | <i>Azotobacter beijerinckii</i>            | Glucose                                                             | 24.8            | 0.09                                                          | 5      |
|                          | <i>Burkholderia cepacia</i>                | Xylose                                                              | 58.4            | ND                                                            | 6      |
|                          | <i>Burkholderia cepacia</i>                | Glycerol                                                            | 31.3            | 0.103                                                         | 7      |
|                          | <i>Burkholderia cepacia</i>                | Fructose, glucose, sucrose                                          | 50.4-59.0       | ND                                                            | 4      |
|                          | <i>Burkholderia sp. USM</i>                | Lauric acid, myristic acid, oleic acid, palmitic acid, stearic acid | 1.0–69.0        | ND                                                            | 8      |
|                          | <i>Caulobacter vibrioides</i>              | Glucose                                                             | 18.3            | 0.008                                                         | 9      |
|                          | <i>Cupriavidus necator</i> H16             | Fructose, glucose                                                   | 67.0–70.5       | 0.052–0.067                                                   | 4      |
|                          | <i>Cupriavidus necator</i> H16             | 4-Hydroxyhexanoic acid                                              | 76.3–78.5       | ND                                                            | 10     |
|                          | <i>Cupriavidus necator</i> H16             | Corn oil, oleic acid, olive oil, palm oil                           | 79.0–82.0       | 0.041–0.047                                                   | 11     |
|                          | <i>Cupriavidus necator</i> H16             | CO <sub>2</sub>                                                     | 88.9            | 0.23                                                          | 12     |
|                          | <i>Cupriavidus necator</i>                 | 4-Hydroxyhexanoic acid                                              | 65.8–66.2       | ND                                                            | 10     |
|                          | <i>Cupriavidus necator</i>                 | 4-Hydroxyhexanoic acid                                              | 67.2            | ND                                                            | 10     |
|                          | <i>Cupriavidus necator</i>                 | CO <sub>2</sub>                                                     | 60              | 0.6                                                           | 13     |
|                          | <i>Cupriavidus necator a</i>               | Glucose                                                             | 76              | 2.42                                                          | 14     |
|                          | <i>Cupriavidus necator a</i>               | Potato starch, saccharified waste                                   | 46              | 1.47                                                          | 15     |
|                          | <i>Cupriavidus necator</i>                 | Molasses                                                            | 31.0–44.0       | 0.080–0.120                                                   | 16     |
|                          | <i>Cupriavidus necator</i>                 | Waste glycerol                                                      | 14.8–36.1       | 0.330–4.200                                                   | 17     |
|                          | <i>Halomonas boliviensis LC1</i>           | Hydrolyzed starch                                                   | 56              | ND                                                            | 18     |
|                          | <i>Methylobacterium extorquens</i>         | Methanol                                                            | 40.0–46.0       | 0.250–0.600                                                   | 19     |
|                          | <i>Methylobacterium extorquens</i>         | Methanol                                                            | 35.0–62.3       | 0.183–0.980                                                   | 20, 21 |
|                          | <i>Methylocystis sp. GB25 a</i>            | Methane                                                             | 51              | ND                                                            | 22     |
|                          | <i>Novosphingobium nitrogenifigens</i> Y88 | Glucose                                                             | 81              | 0.014–0.021                                                   | 23     |
| <i>Streptomyces</i> spp. | Glucose                                    | 1.2–82.0                                                            | ND              | 24                                                            |        |

|                             |                                              |                                                                                                                                                 |           |              |        |
|-----------------------------|----------------------------------------------|-------------------------------------------------------------------------------------------------------------------------------------------------|-----------|--------------|--------|
|                             | <i>Bacillus megaterium</i>                   | Citric acid, glucose, glycerol, succinic acid                                                                                                   | 9.0–50.0  | ND           |        |
|                             | <i>Pseudomonas aeruginosa</i>                | Fructose, Sucrose, glucose, glycerinum                                                                                                          | 12.4–62.0 | 0.012–0.110  | 25     |
|                             | <i>Hydrogenophaga pseudoflava</i>            | Lactose, Sucrose                                                                                                                                | 20.2–62.5 | 0.018–0.117  | 26     |
|                             | <i>Hydrogenophaga pseudoflava</i>            | Hydrolyzed whey and valerate                                                                                                                    | 40        | 0.05         | 27     |
|                             | <i>Haloferax mediterranei</i>                | Vinasse                                                                                                                                         | 50.0–73.0 | 0.050–0.210  | 28     |
|                             | <i>Haloferax mediterranei</i>                | Whey                                                                                                                                            | 72.8      | 0.09         | 29     |
|                             | <i>Haloferax mediterranei</i>                | Glycerinum                                                                                                                                      | 75.0–76.0 | 0.12         | 30     |
|                             | Rhodococcus                                  | Acetate, 2-alkenoate, 1,4-butanediol, 5-chlorovalerate, fructose, glucose, hexanoate, 4-hydroxybutyrate, lactate, molasses, succinate, valerate | 4.0–53.0  | ND           | 31     |
|                             | <i>Cupriavidus necator</i>                   | Glucose, propionic acid                                                                                                                         | 80        | 0.82         | 32     |
| <b>PHV</b>                  | <i>Paracoccus denitrificans</i>              | n-Pentanol                                                                                                                                      | 22.0–24.0 | ND           | 33     |
| <b>PHB &amp; PHBV</b>       | Archaeal                                     | Fructose, glucose, glycerinum                                                                                                                   | 0.8–22.9  | <0.001–0.021 | 34     |
| <b>scl-mcl-PHA</b>          | <i>Pseudomonas mendocina</i>                 | 1,3-Butanediol, octanoate                                                                                                                       | 13.5–19.3 | ND           | 35     |
|                             | <i>Pseudomonas oleovorans</i>                | 4-Hydroxyhexanoic acid                                                                                                                          | 18.6      | ND           | 10     |
|                             | <i>Thermus thermophiles</i> HB8              | Whey                                                                                                                                            | 35.6      | 0.024        | 36     |
| <b>scl-mcl-PHA, mcl-PHA</b> | <i>Pseudomonas marginalis</i>                | 1,3-Butanediol, octanoate                                                                                                                       | 11.9–31.4 | ND           | 35     |
|                             | <i>Pseudomonas putida</i> GPoI               | n-Alkanoates                                                                                                                                    | 5.0–60.0  | ND           | 37, 38 |
| <b>mcl-PHA</b>              | <i>Pseudomonas aeruginosa</i> PAO1           | Oil and wax products from PE pyrolysis                                                                                                          | 25        | ND           | 39     |
|                             | <i>Pseudomonas frederiksbergensis</i> GO23 a | Terephthalic acid from PET pyrolysis                                                                                                            | 24        | 0.004        | 40     |
|                             | <i>Pseudomonas putida</i> CA-3 a             | Styrene                                                                                                                                         | 31.8      | 0.063        | 41     |
|                             | <i>Pseudomonas putida</i> CA-3 a             | Styrene from PS pyrolysis                                                                                                                       | 36.4      | 0.033        | 42     |

|                                                  |                                                |           |                 |    |
|--------------------------------------------------|------------------------------------------------|-----------|-----------------|----|
| <i>Pseudomonas putida</i><br><i>GO16 a</i>       | Terephthalic acid from<br>PET pyrolysis        | 27        | ~0.005, 0.008 d | 40 |
| <i>Pseudomonas putida</i><br><i>GO19 a</i>       | Terephthalic acid from<br>PE and PET pyrolysis | 23        | ~0.005, 0.008 d | 40 |
| <i>Pseudomonas putida</i><br><i>KT2440</i>       | Nonanoic acid                                  | 26.8–75.4 | 0.250–1.110     | 43 |
| <i>Pseudomonas putida</i><br><i>KT2440</i>       | 4-Hydroxyhexanoic acid                         | 25.3–29.8 | ND              | 10 |
| <i>Pseudomonas putida</i><br><i>KT2440</i>       | Glucose                                        | 32.1      | 0.006           | 44 |
| <i>Pseudomonas putida</i> <i>F1</i>              | Benzene, ethylbenzene,<br>toluene              | 1.0–22.0  | ND              | 45 |
| <i>Pseudomonas putida</i> <i>mt-</i><br><i>2</i> | Toluene, p-xylene                              | 22.0–26.0 | ND              | 45 |

PHB: poly(3-hydroxybutyrate); PHBV: poly(3-hydroxybutyrate-co-3-hydroxyvalerate); PHV: poly(3-hydroxyvalerate); scl-PHA: short-chain length PHA; mcl-PHA: medium-chain length PHA; scl-mcl-PHA: short-chain length and medium-chain length PHA; PS: polystyrene; PET: polyethylene terephthalate; PE: polyethylene; ND: no data.

Table S2. Medical applications of PHAs for bone tissue engineering.

| PHAs | Other materials | Methods                         | Type of devices  | Cell types                     | Animal models | Laden drugs  | Ref.s |
|------|-----------------|---------------------------------|------------------|--------------------------------|---------------|--------------|-------|
| PHB  |                 |                                 | Patches          |                                | Minipigs      |              | 46    |
| PHB  |                 |                                 |                  | CRL-1543                       |               |              | 47    |
| PHB  |                 |                                 | Cylindrical pins |                                | Rats          |              | 48    |
| PHB  |                 | Electrospinning                 | Films            |                                |               | Levofloxacin | 49    |
| PHB  |                 | Ultrasonic emulsion             | Nanoparticles    | OCT-1                          |               | BMP2         | 50    |
| PHB  | HA              | Injection molding               |                  |                                | Rabbits       |              | 51    |
| PHB  | HA              | Solvent casting                 | Microspheres     |                                |               |              | 52    |
| PHB  | HA              |                                 | Films            |                                | Rabbits       |              | 53    |
| PHB  | HA              |                                 | Films            | Rat stromal osteoblastic cells | Rats          |              | 54    |
| PHB  | HA              | Phase separation                | Scaffolds        | MC3T3-E1                       |               |              | 55    |
| PHB  | HA              | Solvent casting                 | Films            | MC3T3-E1                       |               |              | 56    |
| PHB  | nHA             | Salt leaching                   | Scaffolds        | MG-63                          |               |              | 57    |
| PHB  | nHA             | Electrospinning                 | Scaffolds        | MSCs                           | Mice          |              | 58    |
| PHB  | HA&Gel          | Electrospinning-electrospraying | Scaffolds        | hMSCs                          |               |              | 59    |

---

|     |                                    |                   |              |                                    |         |    |
|-----|------------------------------------|-------------------|--------------|------------------------------------|---------|----|
| PHB | HA&Gel                             | Electrospinning   | Scaffolds    | MC3T3-E1                           |         | 60 |
| PHB | BG                                 | Solvent casting   | Films        | MG-63                              |         | 61 |
| PHB | HA& BG                             | Injection molding |              |                                    | Rabbits | 62 |
| PHB | CS& Al <sub>2</sub> O <sub>3</sub> | Electrospinning   | Scaffolds    | MG-63                              |         | 63 |
| PHB | CMWCNT                             | Electrospinning   | Scaffolds    | MG-63                              |         | 64 |
| PHB | CNT                                | Electrospinning   | Scaffolds    | MG-63                              |         | 65 |
| PHB | MCNT                               | Electrospinning   | Scaffolds    | SMSCs                              | Rats    | 66 |
| PHB | β-TCP                              | Foam replication  | Scaffolds    |                                    |         | 67 |
| PHB | Ag& β-TCP                          | Coating           | Microspheres |                                    |         | 68 |
| PHB | Coral                              |                   |              |                                    |         | 69 |
|     |                                    |                   |              | Human blood<br>lymphocyte<br>cells |         |    |
| PHB | MMT                                | Solvent casting   | Films        |                                    |         | 70 |
|     |                                    |                   |              | CHL                                |         |    |
| PHB | PEG                                | Solvent casting   | Films        | fibroblasts                        |         | 71 |
| PHB | PEG                                | Electrospinning   | Scaffolds    |                                    |         | 72 |
| PHB | PANi& rGO                          | Electrospinning   | Scaffolds    |                                    | Rats    | 73 |
| PHB | Starch                             | Electrospinning   | Scaffolds    | MG-63                              |         | 74 |

---

---

|      |                   |                                       |                |                                |         |    |
|------|-------------------|---------------------------------------|----------------|--------------------------------|---------|----|
| P4HB |                   | Solvent evaporation                   | Microspheres   | ADSCs                          | Rats    | 75 |
| PHBV |                   | Phase separation                      | Foams          | Rat stromal osteoblastic cells |         | 76 |
| PHBV |                   | Solvent evaporation & solute leaching | Foams          | Rat stromal osteoblastic cells | Rats    | 77 |
| PHBV |                   | Electrospinning                       | Films & fibers | MG-63 & NIH 3T3                |         | 78 |
| PHBV | HA                | Injection molding                     | Plates         |                                |         | 79 |
| PHBV | HA                | Injection molding                     | Scaffolds      |                                | Rabbits | 80 |
| PHBV | HA                | Electrospinning                       | Scaffolds      | MG-63                          |         | 81 |
| PHBV | HA & TCP          | Melt casting                          | Films          |                                |         | 82 |
| PHBV | HA & $\beta$ -TCP | MAPLE Solvent casting-particulate     | Films          | hMSCs                          |         | 83 |
| PHBV | BG                | leaching                              | Scaffolds      | HUVECs & HBMSCs                | Mice    | 84 |

---

---

|      |                  |                                              |               |                                    |            |    |
|------|------------------|----------------------------------------------|---------------|------------------------------------|------------|----|
| PHBV | HA, SGBG&<br>TCP | Salt leaching                                | Scaffolds     | Rabbit primary<br>osteoblast cells |            | 85 |
| PHBV | HA&PLA           | Electrospinning                              | Membranes     |                                    |            | 86 |
| PHBV | nHA              | Melt<br>processing&solvent<br>casting        | Films         | Macrophages&<br>osteoclasts        | Mice       | 87 |
| PHBV | nHA& nD          | Solvent<br>evaporation &<br>solvent casting  | Nanoparticles | RAW 264.7                          | Vancomycin | 88 |
| PHBV | nHA& SF          | Electrospinning                              | Scaffolds     | HOB                                |            | 89 |
| PHBV | nHA& CS          | Electrospinning                              | Scaffolds     | hFOB                               |            | 90 |
| PHBV | nHA& Col         | Salt leaching                                | Scaffolds     | MC3T3-E1                           |            | 91 |
| PHBV | n-HA& PCL        | Solvent-casting&<br>particulate-<br>leaching | Scaffolds     | Saos-2                             |            | 92 |
| PHBV | BW               | Solvent-casting&<br>particulate-<br>leaching | Scaffolds     |                                    |            | 93 |

---



---

|      |                         |                                                          |              |                      |      |     |
|------|-------------------------|----------------------------------------------------------|--------------|----------------------|------|-----|
| PHBV | Wollastonite            | Thermoplastic<br>method                                  | Scaffolds    | Osteoblasts          |      | 94  |
| PHBV | MBGN&<br>CIN            | Emulsion solvent<br>extraction&<br>evaporation<br>method | Microspheres | MG-63                |      | 95  |
| PHBV | PG                      |                                                          | Films        |                      | Dogs | 96  |
| PHBV | PCL                     | Solvent casting                                          | Membranes    | rMSCs                |      | 97  |
| PHBV | PCL                     | Injection molding                                        | Scaffolds    | Vero cells&<br>hMSCs |      | 98  |
| PHBV | PCL,<br>GO&CP           | Electrospinning                                          | Scaffolds    |                      |      | 99  |
| PHBV | PCL-<br>pullulan&<br>DS | Electrospinning                                          | Scaffolds    | Saos-2               | CA   | 100 |
| PHBV | ELR-REDV                | Wet spinning                                             | Scaffolds    | rBMSCs               |      | 101 |
| PHBV | Aloe vera gel           | Electrospinning                                          | Scaffolds    | iPSCs                |      | 102 |
| PHBV | G-BR                    | Electrospinning                                          | Nanofibrous  | hFOB                 |      | 103 |

---

---

|        |              |                        |           |                             |      |     |
|--------|--------------|------------------------|-----------|-----------------------------|------|-----|
| PHBV   | BR&FG        | Electrospinning        | Membranes | hFOB                        |      | 104 |
| PHBV   | CaSH& CS     | 3D Printing            | Scaffolds | rBMSCs                      | Rats | 105 |
| PHBV   | ZnO          | 3D Printing            | Scaffolds | MG-63                       |      | 106 |
| P34HB  |              | Electrospinning        | Scaffolds | rBMSCs                      | Rats | 107 |
| P34HB  | PEG          | Electrospinning        | Membranes |                             |      | 108 |
| P34HB  | PVA          | Electrospinning        | Scaffolds | hBMSCs                      | Mice | 109 |
| PHAs   | $\beta$ -TCP | 3D printing            | Scaffolds | MC3T3-E1                    |      | 110 |
| PHBHHx |              | Solvent<br>evaporation | Films     | MC3T3-E1                    |      | 111 |
| PHBHHx |              | Salt leaching          | Scaffolds | Rabbit bone<br>marrow cells |      | 112 |
| PHBHHx |              | Electrospinning        | Scaffolds | MSCs                        |      | 113 |
| PHBHHx |              | Solvent<br>evaporation | Films     | MSCs                        |      | 114 |
| PHBHHx | SF           | Electrospinning        | Films     | hUC-MSCs                    |      | 115 |

---

---

|                 |                   |                                               |                   |                          |              |     |
|-----------------|-------------------|-----------------------------------------------|-------------------|--------------------------|--------------|-----|
| PHBHHx          | MBG               | 3D printing                                   | Scaffolds         | hMSCs                    |              | 116 |
| PHBHHx          | MBG               | 3D printing                                   | Scaffolds         | hBMSCs                   | Rats         | 117 |
| PHBVHHx         |                   | Method of gas-in-oil-in-water double emulsion | Microspheres      | hMSCs                    | Mice         | 118 |
| PHBVHHx         | PLA& SL           | Emulsion-solvent evaporation                  | Nanoparticles     | hADSCs                   | BMP-2& BMP-7 | 119 |
| P(3HB-4HB-3HHx) |                   | Solvent evaporation                           | Films             | hMSCs                    |              | 120 |
| PHO             | TCP               | Coating                                       |                   |                          |              | 121 |
| PHB& PHBV       |                   | Electrospinning                               | Scaffolds         | HDFs                     |              | 122 |
| PHB & PHBV      | CaCO <sub>3</sub> | Electrospinning                               | Scaffolds         | MC3T3-E1                 |              | 123 |
| PHB & PHBHHx    | HA                | Salt leaching                                 | Scaffolds & films | Rabbit bone marrow cells |              | 124 |

---

---

PHB&

P(3HO-co-

3HD-co-

3HDD)

HA

Solvent casting

Films

125

---

PHB: poly(3-hydroxybutyrate); P4HB: poly(4-hydroxybutyrate); PHBV: poly(3-hydroxybutyrate-co-3-hydroxyvalerate); PHBHHx: poly(3-hydroxybutyrate-co-3-hydroxyhexanoate); P34HB: poly(3-hydroxybutyrate-co-4-hydroxybutyrate); PHBVHHx: poly(3-hydroxybutyrate-co-3-hydroxyvalerate-co-3-hydroxyhexanoate); PHO: poly(3-hydroxyoctanoate); P(3HB-4HB-3HHX): poly(3-hydroxybutyrate-co-4-hydroxybutyrate-co-3-hydroxyhexanoate); P(3HO-co-3HD-co-3HDD): P(3-hydroxyoctanoate-co-3-hydroxydecanoate-co-3-hydroxydodecanoate); HA: hydroxyapatite; nHA: nano scale HA; Gel: gelatin; BG: bioactive glass; CS: chitosan; CMWCNT: carboxyl multi-walled carbon nanotubes; CNT: carbon nanotubes; MCNT: Multiwalled carbon nanotubes;  $\beta$ -TCP:  $\beta$ -tricalcium; MMT: modified montmorillonite; PANi: polyaniline; PEG: polyethylene glycol; rGO: reduced graphene oxide; TCP: tricalcium phosphate; SGBG: sol-gel bioglass; PLA: polylactic acid; nD: nanodiamond; SF: silk fibroin; CS: chitosan; Col: collagen; PCL: polycaprolactone; BW: bioactive wollastonite; MBGN: mesoporous bioactive glass nanoparticles; CIN: cinnamaldehyde; PG: Polylactin 910; GO: Graphene oxide; CP: Calcium phosphate; DS: diatom shell; ELR-REDV: Elastin-like recombinamer (ELR) with the REDV sequence (R: L-Arginine, E: L-Glutamic acid, D: L-Aspartic acid, and V: L-Valine); BR: Bredigite; G-BR: 3-glycidoxypropyltrimethoxysilane (GPTMS)-modified BR; FG: fibrinogen; PVA: polyvinyl alcohol; MBG: mesoporous bioactive glass; SL: soybean lecithin; MAPLE: matrix assisted pulsed laser evaporation; CHL: Chinese Hamster Lung

Table S3. Medical applications of PHAs for cartilage tissue engineering.

| PHAs        | Other materials | Method                                   | Type of devices | Cell type                                       | Animal model | Drug delivery | Ref.s |
|-------------|-----------------|------------------------------------------|-----------------|-------------------------------------------------|--------------|---------------|-------|
| PHB         | CS              | Melt casting                             | Scaffolds       | rMSCs                                           | Sheep        |               | 126   |
| PHB         | CS              | Electrospinning                          | Scaffolds       | Rabbit chondrocyte cells                        | Rabbits      |               | 127   |
| PHB         | CS& MWNTs       | Electrospinning                          | Scaffolds       | Rabbit chondrocyte cells                        | Rabbits      |               | 128   |
| PHBV        |                 | Solvent casting-<br>particulate leaching | Scaffolds       | Chondrocytes, BMSCs& cartilage progenitor cells | Mice         |               | 129   |
| PHBV        | BG              | Stirring emulsification                  | Scaffolds       | Rabbit chondrocyte cells                        | Rabbits      |               | 130   |
| PHBV        | CMChT & SF      | Electrospinning                          | Scaffolds       | rBMSCs                                          | Rats         |               | 131   |
| PHBV        | QUE             | Electrospinning                          | Scaffolds       | Rabbit chondrocyte cells                        | Nude mice    |               | 132   |
| PHBHHx      |                 | Solvent casting                          | Scaffolds       |                                                 | Rabbits      | Chondrocytes  | 133   |
| PHB& PHBHHx |                 | Solvent casting                          | Scaffolds       | Rabbit chondrocytes, BM-MSCs & ASCs             | Rabbits      |               | 134   |

---

|        |                 |       |             |     |
|--------|-----------------|-------|-------------|-----|
| P34HB& |                 |       | Rabbit      |     |
|        |                 |       | chondrocyte |     |
| PHBHHx | Solvent casting | Films | cells       | 135 |

---

PHB: poly(3-hydroxybutyrate); PHBV: poly(3-hydroxybutyrate-co-3-hydroxyvalerate); PHBHHx: poly (3-hydroxybutyrate-co-3-hydroxyhexanoate); P34HB: poly(3-hydroxybutyrate-co-4-hydroxybutyrate); CS: chitosan; MWNTs: multi-walled carbon nanotubes; BG: bioactive glass; CMCh: carboxymethyl chitosan; SF: silk fibroin; QUE: Quercetin

Table S4. Medical applications of PHAs for skin tissue engineering.

| PHAs | Other materials | Method          | Type of devices | Cell type                       | Animal model | Drug delivery | Ref.s |
|------|-----------------|-----------------|-----------------|---------------------------------|--------------|---------------|-------|
| PHB  |                 | Electrospinning | Films           | ADSCs                           |              | Cur           | 136   |
| PHB  | CNT             | Electrospinning | Scaffolds       | Human PDLSCs                    | Rats         |               | 137   |
| PHB  | CS              | Coprecipitation | Scaffolds       | L929                            |              |               | 138   |
| PHB  | O-CS            | Electrospinning | Films           | L930                            |              |               | 139   |
| PHB  | Gel             | Electrospinning | Scaffolds       | Human dermal fibroblasts        |              |               | 140   |
| PHB  | Gel             | Electrospinning | Scaffolds       | Balb/3T3                        | Rats         |               | 141   |
| PHB  | BC              | Solvent casting | Films           | L929                            |              |               | 142   |
| PHB  | BC              | Solvent casting | Scaffolds       | CHL fibroblast                  |              |               | 143   |
| PHB  | CA              | Electrospinning | Scaffolds       | 3T3                             |              |               | 144   |
| PHB  | SPN             | Electrospinning | Scaffolds       | NIH3T3                          |              |               | 145   |
| PHB  | GO& SA          | Solvent casting | Scaffolds       | WS1 human skin fibroblast cells |              | CUR&GS        | 146   |

---

|      |                          |                 |                  |             |      |      |     |
|------|--------------------------|-----------------|------------------|-------------|------|------|-----|
| PHB  | PVA                      | Electrospinning | Scaffolds        | HaCaT       |      |      | 147 |
| PHB  | PANi                     | Electrospinning | Scaffolds        | L929        |      |      | 148 |
| PHBV |                          | Electrospinning | Nanofibers       | HaCaT       |      |      | 149 |
| PHBV |                          | Electrospinning | Nanofibers       | BM-MSCs     |      |      | 150 |
| PHBV |                          | Electrospinning | Scaffolds        | HDF         | Mice |      | 151 |
| PHBV | CS                       | Electrospinning | Scaffolds        | L929        | Rats |      | 152 |
| PHBV | Col                      | Electrospinning | Scaffolds        |             | Rats | USSC | 153 |
| PHBV | Col&Gel                  | Electrospinning | Nanofibers       | Human cells | DS   | Mice | 154 |
| PHBV | Col& GO                  | Electrospinning | Scaffolds        | 3T3-L       |      |      | 155 |
| PHBV | GO & CNFs                | Solvent casting | Films            | ASC         |      |      | 156 |
| PHBV | Pullulan                 | Electrospinning | Scaffolds        | L929        |      |      | 157 |
| PHBV | PDX                      | Electrospinning | Scaffolds        | L929        |      |      | 158 |
| PHBV | Gel & polyethylene oxide | Electrospinning | Electrospun Mats | L929        |      |      | 159 |

---



---

|                            |                                 |                                         |                          |                        |      |     |
|----------------------------|---------------------------------|-----------------------------------------|--------------------------|------------------------|------|-----|
| P34HB                      | Col                             | Electrospinning                         | Nanofibers               | L929                   | Rats | 160 |
| P34HB                      | PCL                             | 3D printing                             | Scaffolds                | HUVECs&<br>BMSCs       | Rats | 161 |
| PHBVHHx                    |                                 | Solvent casting &<br>solvent-extraction | Films &<br>nanoparticles | HaCaT                  |      | 162 |
| PHB &<br>P4HB              | HA, CS,<br>pectin &<br>alginate | Solvent casting                         | Films                    | HaCaT                  |      | 163 |
| PHB &<br>P(3HO-co-<br>3HD) |                                 | Electrospinning                         | Nanofibril               | Human<br>keratinocytes |      | 164 |
| PHBV &<br>PHBHHx           | PLA                             | Melt spinning                           | Fibers                   |                        | Rats | 165 |

---

PHB: poly(3-hydroxybutyrate); P4HB: poly(4-hydroxybutyrate); PHBV: poly(3-hydroxybutyrate-co-3-hydroxyvalerate); PHBHHx: poly(3-hydroxybutyrate-co-3-hydroxyhexanoate); P34HB: poly(3-hydroxybutyrate-co-4-hydroxybutyrate); PHBVHHx: poly(3-hydroxybutyrate-co-3-hydroxyvalerate-co-3-hydroxyhexanoate); CNT: carbon nanotubes; CS: chitosan; O-CS: organic-soluble chitosan; Gel: gelatin; BC: bacterial cellulose; CA: cellulose acetate; SPN: soybean protein nanoparticles; GO: graphene oxide; SA: sodium alginate; PVA: polyvinyl alcohol; PANi: polyaniline; Col: collagen; CNFs: carbon nanofibers; PDX: polydioxanone; PCL: polycaprolactone; PLA: polylactic acid; CHL: Chinese Hamster Lung; CUR: curcumin; CS: chitosan; GS: gymnema sylvestre; USSC: unrestricted somatic stem cells

Table S5. Medical applications of PHAs for muscle and esophagus tissue engineering.

| Application | PHAs   | Other materials | Method                                             | Type of devices     | Cell type   | Animal model | Drug delivery | Ref.s |
|-------------|--------|-----------------|----------------------------------------------------|---------------------|-------------|--------------|---------------|-------|
| Muscle      | PHB    |                 | High-speed melt spinning& spinning drawing process | Scaffolds           |             | Rats         |               | 166   |
|             |        |                 | High-speed melt spinning& spinning drawing process | Scaffolds           |             | Rats         |               | 167   |
|             |        |                 | Electrospinning                                    | Scaffolds           | C2C12& H9c2 |              |               | 168   |
| Esophagus   | PHBV   | Gel             | Electrospinning                                    | Scaffolds           | HEEpiC      |              |               | 169   |
|             | PHBHHx | PLGA&SIS        | Solution casing                                    | Membrane& scaffolds | MSCs        | Rats         |               | 170   |

PHB: poly(3-hydroxybutyrate); PHBV: poly(3-hydroxybutyrate-co-3-hydroxyvalerate); PHBHHx: poly (3-hydroxybutyrate-co-3-hydroxyhexanoate); Gel: gelatin; PLGA: poly (lactic-co-glycolic acid); SIS: small intestinal submucosa

Table S6. Medical applications of PHAs for nerve tissue engineering.

| PHAs | Other materials | Method              | Type of devices | Cell type       | Animal model | Drug delivery | Ref.s |
|------|-----------------|---------------------|-----------------|-----------------|--------------|---------------|-------|
| PHB  |                 |                     | Conduits        |                 | Rabbits      | GGF           | 171   |
| PHB  |                 |                     | Conduits        |                 | Rats         |               | 172   |
| PHB  |                 |                     | Conduits        |                 | Rats         |               | 173   |
| PHB  |                 |                     | Conduits        |                 | Rats         |               | 174   |
| PHB  |                 |                     | Conduits        |                 | Rabbits      |               | 175   |
| PHB  |                 |                     | Conduits        | SCs             | Rats         |               | 176   |
| PHB  |                 | Coating             | Conduits        | MSCs& SCs       | Rats         |               | 177   |
| PHB  |                 | Coating             | Conduits        |                 | Rabbits      | GGF           | 178   |
| PHB  |                 |                     | Scaffolds       |                 | Rats         |               | 179   |
| PHB  | PCL             | Salt leaching       | Scaffolds       | iPS             |              |               | 180   |
| PHBV |                 | Solvent evaporation | Microspheres    | Neuro2a cells   |              |               | 181   |
| PHBV |                 | Solvent evaporation | Microspheres    | PC12, CNs& NPCs |              |               | 182   |
| PHBV | Col             | Electrospinning     | Scaffolds       | PC12            |              |               | 183   |

---

|            |         |                                   |                      |                                              |      |     |
|------------|---------|-----------------------------------|----------------------|----------------------------------------------|------|-----|
| PHBV       | CS      | Electrospinning                   | Scaffolds            | SCs                                          | Rats | 184 |
| PHBHHx     |         | Particle leaching                 | Conduits             |                                              | Rats | 185 |
| PHBHHx     |         | Solvent casting                   | Films&scaffolds      | NSCs                                         |      | 186 |
| PHBHHx     | PDLLA   | Solvent casting                   | Films                |                                              |      | 187 |
| PHBHHx     | rGO& Au | Electrospinning                   | Scaffolds            | SCs                                          |      | 188 |
| PHBVHHx    |         | Solvent casting& phase separation | Membranes& scaffolds | hBMSCs                                       |      | 189 |
| P(3HO-3HD) | PCL     | Solvent casting                   | Conduits             | NG108-15& SCs                                | Rats | 190 |
| PHB& PHBV  |         | Electrospinning                   | Scaffolds            | SCs                                          |      | 191 |
| PHB& PHO   |         | Solvent casting                   | Conduits             | SCs                                          |      | 192 |
| PHB & PHO  |         | Electrospinning                   | Scaffolds            | NG108-15 neuronal cells & RN22 Schwann cells |      | 193 |

---

NG108-15

neuronal cells

& RN22

PHB&PHO

BG

Solvent casting

Films

Schwann cells

194

---

PHB: poly(3-hydroxybutyrate); PHBV: poly(3-hydroxybutyrate-co-3-hydroxyvalerate); PHBHHx: poly(3-hydroxybutyrate-co-3-hydroxyhexanoate); PHBVHHx: poly(3-hydroxybutyrate-co-3-hydroxyvalerate-co-3-hydroxyhexanoate); PHO: poly(3-hydroxyoctanoate); P(3HO-3HD): poly(3-hydroxyoctanoate-co-3-hydroxydecanoate); PCL: polycaprolactone; Col: collagen; GS: gymyema sylvestre; PDLLA: poly(DL-lactide); rGO: reduced Graphene oxide; BG: bioactive glass; GGF: glial growth factor

Table S7. Medical applications of PHAs for cardiovascular tissue engineering.

| PHAs | Other materials | Method                              | Type of devices           | Cell type                                            | Animal model    | Drug delivery | Ref.s |
|------|-----------------|-------------------------------------|---------------------------|------------------------------------------------------|-----------------|---------------|-------|
| PHB  |                 | Solvent casting                     | Patches                   | L929                                                 | Rabbits & sheep |               | 195   |
| PHB  |                 | Electrospinning                     | Nanofibers                | MSCs, cardiomyocytes & cardiac fibroblasts           | Rats            |               | 196   |
| PHB  | ePTFE           | Electrospinning                     | Vascular Disease Detector | HUVECs                                               |                 |               | 197   |
| P4HB |                 | Salt leaching                       | Scaffolds                 | Sheep SMCs, endothelial cells & fibroblasts          |                 |               | 198   |
| P4HB |                 | Salt leaching & solvent evaporation | Patches                   | Endothelial cells, smooth muscle cells & fibroblasts | Lambs           |               | 199   |
| P4HB | PGA             | Solvent evaporation                 | Scaffolds                 | Myofibroblasts                                       | Lambs           |               | 200   |
| P4HB | PGA             | Coating                             | Patches                   | Ovine EPCs & MSCs                                    | Sheep           |               | 201   |
| PHBV |                 | Electrospinning                     | Scaffolds                 | HDFs & HDMECs                                        |                 |               | 202   |

---

|        |     |                 |           |         |                                                                                   |     |
|--------|-----|-----------------|-----------|---------|-----------------------------------------------------------------------------------|-----|
| PHBV   |     | Electrospinning | Scaffolds | Sheep   | VEGF, bFGF,<br>SDF-1 $\alpha$ ,<br>surface<br>coated with<br>heparin&<br>iloprost | 203 |
| PHBV   | PCL | Electrospinning | Scaffolds | Rats    |                                                                                   | 204 |
| PHBV   | PCL | Electrospinning | Scaffolds | Rats    | VEGF,<br>bFGF&SDF-<br>1 $\alpha$                                                  | 205 |
| PHBV   | PCL | Electrospinning | Scaffolds | Rats    | VEGF&<br>RGD                                                                      | 206 |
| PHBV   | PCL | Electrospinning | Scaffolds | Sheep   | VEGF 、<br>bFGF 、<br>SDF-1 $\alpha$ 、<br>heparin&<br>iloprost                      | 207 |
| PHBV   | PCL | Electrospinning | Patches   | Rats    | RGD                                                                               | 208 |
| PHBV   | PCL | Electrospinning | Patches   | Rats    | VEGF                                                                              | 209 |
| PHBHHx |     | Solvent casting | Patches   | Rabbits |                                                                                   | 210 |
| PHBHHx |     | Electrospinning | Scaffolds |         |                                                                                   | 211 |
| PHBHHx |     | Electrospinning | Scaffolds | PIECs   |                                                                                   | 212 |

---

---

|            |                                        |                                   |                    |                                                      |                 |     |
|------------|----------------------------------------|-----------------------------------|--------------------|------------------------------------------------------|-----------------|-----|
| PHBHHx     | SF                                     |                                   | Scaffolds          | Human fibroblasts, hSMCs & HUVECs                    |                 | 213 |
| PHBHHx     | Decellularized porcine aortic valves   | Coating                           | Patches & conduits |                                                      | Rabbits & sheep | 214 |
| PHBHHx     | Plasma treatment & fibronectin coating | Solvent casting                   | Films              | HUVECs & SMCs                                        |                 | 215 |
| P34HB      |                                        | Solvent casting                   | Films & scaffolds  | RaSMCs                                               |                 | 216 |
| P34HB      |                                        | Ultrasonic spray-coating          | Films              | L929                                                 |                 | 217 |
| PHO        |                                        | Salt leaching                     | Scaffolds          | Ovine vascular cells                                 | Lambs           | 218 |
| PHO        |                                        | Electrospinning                   | Nanofibers         | Rat cardiomyocytes                                   | VEGF & RGD      | 219 |
| PHO        | PGA                                    |                                   | Scaffolds          | Endothelial cells, smooth muscle cells & fibroblasts | Lambs           | 220 |
| PHB & PHBV |                                        | Solvent casting & Electrospinning | Films              | 3T3, L929, HUVECs & EPCs                             |                 | 221 |

---



---

|                             |                                     |                         |                         |     |
|-----------------------------|-------------------------------------|-------------------------|-------------------------|-----|
| PHB, PHBV<br>& PHBHHx       | Solvent casting                     | Films                   | HUVECs                  | 222 |
| PHB,<br>PHBV&<br>PHO        | Solvent casting&<br>electrospinning | Films<br>&<br>scaffolds |                         | 223 |
| PHO &<br>P(3HN-co-<br>3HHP) |                                     | Scaffolds               | NVRM                    | 224 |
| MCL-PHA PCL                 | Solvent casting                     | Films                   | CPCs Mice               | 225 |
| PHA                         | Salt leaching                       | Scaffolds               | Ovine vascular<br>cells | 226 |
| PHA                         | Salt leaching                       | Scaffolds               | Ovine vascular<br>cells | 227 |

---

PHB: poly(3-hydroxybutyrate); P4HB: poly(4-hydroxybutyrate); PHBV: poly(3-hydroxybutyrate-co-3-hydroxyvalerate); PHBHHx: poly(3-hydroxybutyrate-co-3-hydroxyhexanoate); P34HB: poly(3-hydroxybutyrate-co-4-hydroxybutyrate); PHO: poly(3-hydroxyoctanoate); P(3HN-co-3HHP): poly(3-hydroxynonanoate-co-3-hydroxyheptanoate); ePTFE: an expanded polytetrafluoroethylene; PGA: polyglycolic acid; PCL: polycaprolactone; SF: silk fibroin; RGD: Arg-Gly-Asp; VEGF: vascular endothelial growth factor; bFGF: basic fibroblast growth factor; SDF-1 $\alpha$ : stromal cell-derived factor 1

Table S8. Medical applications of PHAs for liver, tendon, eyes and eyelid tissue engineering.

| Application | PHAs                                 | Other materials | Method                                | Type of devices | Cell type               | Animal model | Drug delivery | Ref.s |
|-------------|--------------------------------------|-----------------|---------------------------------------|-----------------|-------------------------|--------------|---------------|-------|
| Liver       | PHBV                                 |                 | Solvent evaporation                   | Microspheres    | HepG2 & Hep3B           |              |               | 228   |
| Liver       | PHBV                                 | PLGA            | Solvent evaporation                   | Microspheres    | Rat primary hepatocytes |              | HGF           | 229   |
| Liver       | PHBVHHx                              |                 |                                       | Scaffolds       | UC-MSCs                 | Mice         |               | 230   |
| Tendon      | PHBHHx, PHB, PHBV, PHUA, PHUE, PHOUE | Col             | Particle leaching & extrusion methods | Tubes & fibers  |                         | Rats         | Tenocyte      | 231   |
| Tendon      | PHOUE-POSS, PHUE-O3,                 |                 | Solvent casting & phase separation    | Films           | L929                    |              |               | 232   |
| Eyes        | PHBV                                 |                 | Solvent evaporation                   | Microspheres    |                         | Mice         | Rapamycin     | 233   |
| Eyelid      | PHBHHx                               |                 | Solvent casting                       | Scaffolds       |                         | Rats         |               | 234   |
| Eyes        | PHBHHx                               | PEG & PPG       | Chemical synthesis                    | Thermogels      |                         | Rabbits      |               | 235   |

PHBV: poly(3-hydroxybutyrate-co-3-hydroxyvalerate); PHBHHx: poly (3-hydroxybutyrate-co-3-hydroxyhexanoate); PHBVHHx: poly(3-hydroxybutyrate-co-3-hydroxyvalerate-co-3-hydroxyhexanoate); PHUA: poly(3-hydroxyundecanoate); PHUE: poly(3-hydroxy-10-undecenoate); PHOUE: poly(3-hydroxyoctanoate-co-3-hydroxy-10-undecenoate); PHOUE-POSS: PHOU (50/50) derivatised with polyhedral oligomeric silsesquioxane; PHUE-O3: ozone treated PHUE with unknown degree of oxidation, exact formula not known; PLGA: poly(lactic-co-glycolic acid); Col: collagen; PEG: polyethylene glycol; PPG: poly(propylene glycol); HGF: hepatocyte growth factor

## References

1. F. L. Wang and S. Y. Lee, *Applied & Environmental Microbiology*, 1997, **63**, 3703-3706.
2. E. Grothe, M. Moo-Young and Y. Chisti, *Enzyme and Microbial Technology*, 1999, **25**, 132-141.
3. T. Yamane, M. F. And and W. L. Yong, *Biotechnology and Bioengineering*, 1996.
4. J. Gomez, M. Rodrigues and R. Alli..., *Applied Microbiology & Biotechnology*, 1996, **45**, 785-791.
5. Z. Lasemi, G. N. Darzi and M. S. Baei, *International Journal of Polymeric Materials & Polymeric Biomaterials*, 2013, **62**, 265-269.
6. W. Pan, J. A. Perrotta, A. J. Stipanovic, C. T. Nomura and J. P. Nakas, *Journal of Industrial Microbiology & Biotechnology*, 2012, **39**, 459-469.
7. Zhu, Chengjun, Nomura, Christopher, T., Perrotta, Joseph, A., Stipanovic and Arthur, *Biotechnol Progress*, 2009, **26**, NA-NA.
8. J. Y. Chee, Y. Tan, M. R. Samian and K. Sudesh, *Journal of Polymers and the Environment*, 2010, **18**, 584-592.
9. B. Rehm and Q. Qi, *Microbiology*, 2001, **147**, 3353-3358.
10. H. E. Valentin, E. Y. Lee and C. Choi..., *Applied Microbiology & Biotechnology*, 1994, **40**, 710-716.
11. Fukui and Doi, *APPL MICROBIOL BIOTECHNOL*, 1998, **1998,49(3)**, 333-336.
12. B. Sonnleitner, E. Heinzle, G. Braunegg and R. M. Lafferty, *European Journal of Applied Microbiology & Biotechnology*, 1979, **7**, 1-10.
13. A. Ishizaki and K. Tanaka, *Journal of Fermentation & Bioengineering*, 1991, **71**, 254-257.
14. Beom, Soo, Kim, Seung, Chul, Lee, Sang, Yup, Lee and Ho, *Biotechnology & Bioengineering*, 2010, **43**, 892-898.
15. R. Haas, B. Jin and F. T. Zepf, *Bioscience Biotechnology & Biochemistry*, 2008, **72**, 253-256.
16. Beaulieu, Melinard, Pandian and Goulet, *Applied and environmental microbiology*, 1995, **61**, 165-169.
17. J. Cavalheiro, M. Almeida, C. Grandfils and M. Fonseca, *Process Biochemistry*, 2009, **44**, 509-515.
18. J. Quillaguamán, S. Hashim, F. Bento, B. Mattiasson and R. Hatti-Kaul, *Journal of Applied Microbiology*, 2005, **99**, 151-157.
19. D. Bourque, Y. Pomerleau and D. Groleau, *Applied Microbiology and Biotechnology*, 1995, **44**, 367-376.
20. Z. B. Mokhtari-Hosseini, E. Vasheghani-Farahani, A. Heidarza De H-Vazifekhoran, S. A. Shojaosadati and K. K. Darani, *Bioresource Technology*, 2009, **100**, 2436-2443.
21. Zahra, Beagom, Mokhtari-Hosseini, Ebrahim, Vasheghani-Farahani, Seyed, Abbas, Shojaosadati, Ramin and Karimzadeh, *Journal of Chemical Technology and Biotechnology*, 2009, **84**, 1136-1139.
22. K.-D., Wendlandt, and, M., Jechorek, and, J., Helm, and and U., *Polymer Degradation & Stability*, 1998.
23. A. M. Smit, T. J. Strabala, L. Peng, P. Rawson, G. Lloyd-Jones and T. W. Jordan, *Appl Environ Microbiol*, 2012, **78**, 4802-4815.
24. S. P. Valappil, A. R. Boccaccini, C. Bucke and I. Roy, *Antonie Van Leeuwenhoek*, 2007, **91**, 1-17.
25. A. D. Tripathi, A. Yadav, A. Jha and S. K. Srivastava, *Journal of Polymers & the Environment*,

- 2012, **20**, 446-453.
26. S. Povolò, M. G. Romanelli, M. Basaglia, V. I. Ilieva, A. Corti, A. Morelli, E. Chiellini and S. Casella, *N Biotechnol*, 2013, **30**, 629-634.
  27. *Macromolecular Bioscience*, 2010, **7**, 218-226.
  28. A. Bhattacharyya, A. Pramanik, S. K. Maji, S. Haldar, U. K. Mukhopadhyay and J. Mukherjee, *Amb Express*, 2012, **2**, 34-34.
  29. M. Koller, A. Atli, Y. Gonzalez-Garcia, C. Kutschera and G. Braunegg, *Macromolecular Symposia*, 2008, **272**.
  30. H. K. Carmen, K. Martin, M. Alexander, F. Hubert, S. Franz and B. Gerhart, *Archaea-an International Microbiological Journal*, 2013, **2013**, 129268.
  31. G. W. Haywood, A. J. Anderson, D. R. Williams, E. A. Dawes and D. F. Ewing, *International Journal of Biological Macromolecules*, 1991, **13**, 83-88.
  32. Y. S. Lun, *Biochemical Engineering Journal*, 2001.
  33. T. Yamane, X. F. Chen and S. Ueda, *Applied & Environmental Microbiology*, 1996, **62**, 380-384.
  34. Xiang, Zhou and Feng.
  35. E. Y. Lee, D. Jendrossek, A. Schirmer and C. Choi..., *Applied Microbiology & Biotechnology*, 1995, **42**, 901-909.
  36. A. A. Pantazaki, C. P. Papanephytòu, A. G. Pritsa, M. Liakopoulou-Kyriakides and D. A. Kyriakidis, *Process Biochemistry*, 2009, **44**, 847-853.
  37. R. A. Gross, C. Demello, R. W. Lenz, H. Brandl and R. C. Fuller, *Macromolecules*, 1989, **22**, 827-838.
  38. Elbahloul, Yasser, Steinbüchel and Alexander, *Applied & Environmental Microbiology*, 2009, **75**, 643-651.
  39. M. W. Guzik, S. T. Kenny, G. F. Duane, E. Casey and K. E. O'Connor, *Applied Microbiology & Biotechnology*, 2014, **98**.
  40. S. T. Kenny, J. N. Runic, W. Kaminsky, T. Woods, R. P. Babu, C. M. Keely, W. Blau and K. O'Connor, *Environmental Science & Technology*, 2008, **42**, 7696-7701.
  41. J. Nikodinovic-Runic, E. Casey, G. F. Duane, D. Mitic, A. R. Hume, S. T. Kenny and K. E. O'Connor, *Biotechnology & Bioengineering*, 2011, **108**, 2447-2455.
  42. P. G. Ward, M. Goff, M. Donner, W. Kaminsky and K. E. O'Connor, *Environmental Science & Technology*, 2006, **40**, 2433-2437.
  43. Z. Sun, J. A. Ramsay, M. Guay and B. Ramsay, *Applied Microbiology & Biotechnology*, 2007, **74**, 69-77.
  44. R. Davis, R. Kataria, F. Cerrone, T. Woods, S. Kenny, A. O'Donovan, M. Guzik, H. Shaikh, G. Duane and V. K. Gupta, *Bioresource Technology*, 2013, **150**, 202-209.
  45. J. Nikodinovic, S. T. Kenny, R. P. Babu, T. Woods, W. J. Blau and K. E. O'Connor, *Applied Microbiology and Biotechnology*, 2008, **80**, 665-673.
  46. H. E. Bernd, C. Kunze, T. Freier, K. Sternberg, S. Kramer, D. Behrend, F. Prall, M. Donat and B. Kramp, *Acta Oto-Laryngologica*, 2009, **129**, 1010-1017
  47. O. Shamsuria, A. S. Fadilah, A. B. Asiah, M. R. Rodiah, A. H. Suzina and A. R. Samsudin, *The Medical journal of Malaysia*, 2004, **59 Suppl B**, 174-175
  48. M. Meischel, J. Eichler, E. Martinelli, U. Karr, J. Weigel, G. Schmöller, E. K. Tschegg, S. Fischerauer, A. M. Weinberg and S. E. Stanzl-Tschegg, *Journal of the Mechanical Behavior of Biomedical Materials*, 2016, **53**, 104-118

49. V. Kundrat, N. Cernekova, A. Kovalcik, V. Enev and I. Marova, *Materials*, 2019, **12**, 1924.
50. X. Peng, Y. Chen, Y. Li, Y. Wang and X. Zhang, *BioMed Research International*, 2016, **2016**.
51. C.Doyle, E.T.Tanner and W.Bonfield, *Biomaterials*, 1991, **12**, 841-847
52. N.R.Boeree, J.Dove, J.J.Cooper and J.Knowles, *Biomaterials*, 1993, **14**, 793-796
53. Z. B. Luklinska and W. Bonfield, *Journal of Materials Science: Materials in Medicine*, 1997, **8**, 379-383.
54. E. I. Shishatskaya, I. A. Khlusov and T. G. Volova, *Journal of Biomaterials Science, Polymer Edition*, 2006, **17**, 481-498.
55. M. Degli Esposti, F. Chiellini, F. Bondioli, D. Morselli and P. Fabbri, *Materials Science & Engineering. C, Materials for Biological Applications*, 2019, **100**, 286-296.
56. M. Sadat-Shojai, M.-T. Khorasani, A. Jamshidi and S. Irani, *Materials Science and Engineering: C*, 2013, **33**, 2776-2787
57. A. Nemati Hayati, S. M. Hosseinalipour, H. R. Rezaie and M. A. Shokrgozar, *Materials Science and Engineering: C*, 2012, **32**, 416-422.
58. Z. Chen, Y. Song, J. Zhang, W. Liu, J. Cui, H. Li and F. Chen, *Materials Science & Engineering. C, Materials for Biological Applications*, 2017, **72**, 341-351
59. J. Ramier, D. Grande, T. Boudierlique, O. Stoilova, N. Manolova, I. Rashkov, V. Langlois, P. Albanese and E. Renard, *Journal of Materials Science. Materials in Medicine*, 2014, **25**, 1563-1575.
60. M. Sadat-Shojai, M.-T. Khorasani and A. Jamshidi, *Chemical Engineering Journal*, 2016, **289**, 38-47
61. S. K. Misra, D. Mohn, T. J. Brunner, W. J. Stark, S. E. Philip, I. Roy, V. Salih, J. C. Knowles and A. R. Boccaccini, *Biomaterials*, 2008, **29**, 1750-1761.
62. J.C.Knowles, G.W.Hastings, H.Ohta, S.Niwa and N.Boeree, *Biomaterials*, 1992, **13**, 491-496
63. E. B. Toloue, S. Karbasi, H. Salehi and M. Rafienia, *Materials Science and Engineering: C*, 2019, **99**, 1075-1091.
64. C. Zhijiang, Z. Cong, G. Jie, Z. Qing and Z. Kongyin, *Materials Science and Engineering: C*, 2018, **82**, 29-40
65. M. Zarei and S. Karbasi, *Journal of Porous Materials*, 2018, **25**, 259-272.
66. N. Tanideh, N. Azarpira, N. Sarafraz, S. Zare, A. Rowshanghiyas, N. Farshidfar, A. Iraj, M. Zarei and M. El Fray, *Polymers*, 2020, **12**, 2588
67. S. Skibiński, P. Pańtak, E. Cichoń, M. Guzik, J. Czechowska, A. Ślósarczyk and A. Zima, *Engineering of Biomaterials*, 2021, **24**.
68. J. Czechowska, S. Skibiński, M. Guzik and A. Zima, *Materials*, 2021, **14**, 4227.
69. K. A. Al-Salihi and A. R. Samsudin, *The Medical Journal of Malaysia*, 2004, **59 Suppl B**, 202-203
70. A. Mohan, M. Girdhar, R. Kumar, H. S. Chaturvedi, A. Vadhel, P. R. Solanki, A. Kumar, D. Kumar and N. Mamidi, *Pharmaceuticals*, 2021, **14**, 1163.
71. G. Cheng, Z. Cai and L. Wang, *Journal of Materials Science: Materials in Medicine*, 2003, **14**, 1073-1078.
72. K. L. Liu, E. S. G. Choo, S. Y. Wong, X. Li, C. B. He, J. Wang and J. Li, *The Journal of Physical Chemistry. B*, 2010, **114**, 7489-7498.
73. R. A. Surmenev, A. N. Ivanov, A. Cecilia, T. Baumbach, R. V. Chernozem, S. Mathur and M. A. Surmeneva, *Open Ceramics*, 2022, **9**, 100237.

74. M. A. Asl, S. Karbasi, S. Beigi-Boroujeni, S. Z. Benisi and M. Saeed, *International Journal of Biological Macromolecules*, 2021, **191**, 500-513.
75. S. Yuan, Y. Shen and Z. Li, *ACS Applied Bio Materials*, 2021, **4**, 4432-4440.
76. G. Torun Köse, S. Ber, F. Korkusuz and V. Hasirci, *Journal of Materials Science: Materials in Medicine*, 2003, **14**, 121-126.
77. G. T. Köse, F. Korkusuz, P. Korkusuz and V. Hasirci, *Tissue Engineering*, 2004, **10**, 1234-1250.
78. Ł. Kaniuk, Z. J. Krysiak, S. Metwally and U. Stachewicz, *Materials Science and Engineering: C*, 2020, **110**, 110668.
79. S. Coskun, F. Korkusuz and V. Hasirci, *Journal of Biomaterials Science, Polymer Edition*, 2005, **16**, 1485-1502
80. Z. B. Luklinska and H. Schluckwerder, *Journal of Microscopy*, 2003, **211**, 121-129
81. J. E. Karbowniczek, Ł. Kaniuk, K. Berniak, A. Gruszczyński and U. Stachewicz, *Frontiers in bioengineering and biotechnology*, 2021, **9**, 70.
82. L.J.Chen and M.Wang, *Biomaterials*, 2002, **23**, 2631-2639
83. O. Raşoga, L. Sima, M. Chiriţoiu, G. Popescu-Pelin, O. Fufă, V. Grumezescu, M. Socol, A. Stănculescu, I. Zgură and G. Socol, *Applied Surface Science*, 2017, **417**, 204-212.
84. J. Wu, Z. Wu, Z. Xue, H. Li and J. Liu, *RSC Advances*, 2017, **7**, 22197-22207.
85. Y. Zheng, Y. Wang, H. Yang, X. Chen and Z. Chen, *Journal of Biomedical Materials Research. Part B, Applied Biomaterials*, 2007, **80**, 236-243.
86. M. I. Hassan, N. N. Masnawi and N. Sultana, *ASAIO Journal*, 2018, **64**, 415-423.
87. S. M. Cool, B. Kenny, A. Wu, V. Nurcombe, M. Trau, A. I. Cassady and L. Grøndahl, *Journal of Biomedical Materials Research Part A*, 2007, **82A**, 599-610
88. G. R. de Almeida Neto, M. V. Barcelos, M. E. A. Ribeiro, M. M. Folly and R. J. S. Rodríguez, *Materials Science and Engineering: C*, 2019, **104**, 110004.
89. E. I. Paşcu, J. Stokes and G. B. McGuinness, *Materials Science & Engineering. C, Materials for Biological Applications*, 2013, **33**, 4905-4916
90. S. Zhang, M. P. Prabhakaran, X. Qin and S. Ramakrishna, *Journal of the Mechanical Behavior of Biomedical Materials*, 2015, **51**, 88-98
91. J.-Y. Baek, Z.-C. Xing, G. Kwak, K.-B. Yoon, S.-Y. Park, L. S. Park and I.-K. Kang, *Journal of Nanomaterials*, 2012, **2012**, e171804
92. A. Nahanmoghadam, M. Asemani, V. Goodarzi and S. Ebrahimi-Barough, *Journal of Biomedical Materials Research Part A*, 2021, **109**, 981-993.
93. H. Li and J. Chang, *Biomaterials*, 2004, **25**, 5473-5480.
94. H. Li, W. Zhai and J. Chang, *Journal of Materials Science. Materials in Medicine*, 2008, **19**, 67-73
95. K. Chotchindakun, J. Pekkoh, J. Ruangsuriya, K. Zheng, I. Unalan and A. R. Boccaccini, *Polymers*, 2021, **13**, 1794.
96. K. Gotfredsen, L. Nimb and E. Hjørtning-Hansen, *Clinical Oral Implants Research*, 1994, **5**, 83-91 %U <https://pubmed.ncbi.nlm.nih.gov/7918913/>.
97. V. Nascimento, S. Malmonge and A. Santos Jr, *Brazilian Journal of Biology*, 2021, **83**.
98. A. A. Rodrigues, N. A. Batista, S. M. Malmonge, S. A. Casarin, J. A. M. Agnelli, A. R. Santos and W. D. Belangero, *Journal of Materials Science: Materials in Medicine*, 2021, **32**, 1-13.
99. V. Kheiri Mollaqaesem, A. Asefnejad, M. R. Nourani, V. Goodarzi and M. R. Kalaei, *Journal of Applied Polymer Science*, 2021, **138**, 49797.

100. A. D. Dalgic, D. Atila, A. Karatas, A. Tezcaner and D. Keskin, *Materials Science and Engineering: C*, 2019, **100**, 735-746.
101. A. S. Alagoz, J. C. Rodriguez-Cabello and V. Hasirci, *Biomedical Materials*, 2018, **13**, 055010.
102. A. Tahmasebi, A. Shapouri Moghadam, S. E. Enderami, M. Islami, M. Kaabi, E. Saburi, A. Daei Farshchi, F. Soleimanifar and V. Mansouri, *ASAIO Journal*, 2020, **66**, 966-973.
103. M. Kouhi, V. Jayarama Reddy and S. Ramakrishna, *Applied biochemistry and biotechnology*, 2019, **188**, 357-368.
104. M. Kouhi, V. Jayarama Reddy, M. Fathi, M. Shamanian, A. Valipouri and S. Ramakrishna, *Journal of Biomedical Materials Research Part A*, 2019, **107**, 1154-1165.
105. X. Ye, L. Li, Z. Lin, W. Yang, M. Duan, L. Chen, Y. Xia, Z. Chen, Y. Lu and Y. Zhang, *Carbohydrate polymers*, 2018, **202**, 106-114.
106. C. Shuai, C. Wang, F. Qi, S. Peng, W. Yang, C. He, G. Wang and G. Qian, *Journal of Nanomaterials*, 2020, **2020**.
107. N. Fu, Z. Meng, T. Jiao, X. Luo, Z. Tang, B. Zhu, L. Sui and X. Cai, *Cell Proliferation*, 2019, **52**, e12601.
108. Z. Wang, R. Liang, X. Cheng, Q. Lan, J. Xie, M. He, Y. Pang, F. Xiong, D. Lei, L. Zheng and J. Zhao, *Journal of Biomedical Nanotechnology*, 2019, **15**, 1280-1289.
109. L. Yang, Y. Zhao, D. Cui, Y. Liu, Q. Zou, S. Xu, S. Luo and C. Ye, *Materials & Design*, 2022, **213**, 110349.
110. X. Ye, Y. Zhang, T. Liu, Z. Chen, W. Chen, Z. Wu, Y. Wang, J. Li, C. Li and T. Jiang, *International Journal of Biological Macromolecules*, 2022.
111. J. Li, H. Yun, Y. Gong, N. Zhao and X. Zhang, *Journal of Biomedical Materials Research Part A*, 2005, **75A**, 985-998.
112. Y.-W. Wang, Q. Wu and G.-Q. Chen, *Biomaterials*, 2004, **25**, 669-675
113. Y. Wang, R. Gao, P.-P. Wang, J. Jian, X.-L. Jiang, C. Yan, X. Lin, L. Wu, G.-Q. Chen and Q. Wu, *Biomaterials*, 2012, **33**, 485-493
114. Y. Wang, X.-L. Jiang, S.-C. Yang, X. Lin, Y. He, C. Yan, L. Wu, G.-Q. Chen, Z.-Y. Wang and Q. Wu, *Biomaterials*, 2011, **32**, 9207-9217.
115. S. L. Ang, B. Shaharuddin, J.-A. Chuah and K. Sudesh, *International Journal of Biological Macromolecules*, 2020, **145**, 173-188
116. S. Yang, J. Wang, L. Tang, H. Ao, H. Tan, T. Tang and C. Liu, *Colloids and Surfaces B: Biointerfaces*, 2014, **116**, 72-80.
117. S. Zhao, M. Zhu, J. Zhang, Y. Zhang, Z. Liu, Y. Zhu and C. Zhang, *Journal of Materials Chemistry B*, 2014, **2**, 6106-6118
118. D.-X. Wei, J.-W. Dao and G.-Q. Chen, *Advanced Materials*, 2018, **30**, 1802273
119. X.-H. Zhao, X.-L. Peng, H.-L. Gong and D.-X. Wei, *Biomedical Materials*, 2021, **16**, 044102
120. X. Wei, Y.-J. Hu, W.-P. Xie, R.-L. Lin and G.-Q. Chen, *Journal of Biomedical Materials Research. Part A*, 2009, **90**, 894-905.
121. E. Cichoń, K. Harażna, S. Skibiński, T. Witko, A. Zima, A. Ślósarczyk, M. Zimowska, M. Witko, B. Leszczyński and A. Wróbel, *Journal of the Mechanical Behavior of Biomedical Materials*, 2019, **98**, 235-245.
122. A. Esmail, J. R. Pereira, P. Zoio, S. Silvestre, U. D. Menda, C. Sevrin, C. Grandfils, E. Fortunato, M. A. Reis and C. Henriques, *Polymers*, 2021, **13**, 1056.
123. R. Chernozem, M. Surmeneva, S. Shkarina, K. Loza, M. Epple, M. Ulbricht, A. Cecilia, B.

- Krause, T. Baumbach and A. Abalymov, *ACS applied materials & interfaces*, 2019, **11**, 19522-19533.
124. Y.-W. Wang, Q. Wu, J. Chen and G.-Q. Chen, *Biomaterials*, 2005, **26**, 899-904
125. E. Marcello, M. Maqbool, R. Nigmatullin, M. Cresswell, P. R. Jackson, P. Basnett, J. C. Knowles, A. R. Boccaccini and I. Roy, *Frontiers in Bioengineering and Biotechnology*, 2021, **9**.
126. M. Giretova, L. Medvecky, E. Petrovova, D. Cizkova, J. Danko, D. Mudronova, L. Slovinska and R. Bures, *Applied Biochemistry and Biotechnology*, 2019, **189**, 556-575
127. D. Sadeghi, S. Karbasi, S. Razavi, S. Mohammadi, M. A. Shokrgozar and S. Bonakdar, *Journal of Applied Polymer Science*, 2016, **133**.
128. Z. Mohammadalizadeh, S. Karbasi and S. Arasteh, *Polymer-Plastics Technology and Materials*, 2020, **59**, 417-429.
129. K. Xue, X. Zhang, Z. Gao, W. Xia, L. Qi and K. Liu, *Journal of translational medicine*, 2019, **17**, 1-11.
130. J. Wu, K. Xue, H. Li, J. Sun and K. Liu, *PLOS ONE*, 2013, **8**, e71563.
131. O. C. Gunes, A. Z. Albayrak, S. Tademir and A. Sendemir, *Journal of Biomaterials Applications*, 2020, **35**, 515-531.
132. W. Chen, Y. Li, Y. Huang, Y. Dai, T. Xi, Z. Zhou and H. Liu, *Journal of Materials Science: Materials in Medicine*, 2021, **32**, 1-10.
133. Y. Wang, Y.-Z. Bian, Q. Wu and G.-Q. Chen, *Biomaterials*, 2008, **29**, 2858-2868.
134. K. Ba, X. Wei, D. Ni, N. Li, T. Du, X. Wang and W. Pan, *Cell Transplantation*, 2019, **28**, 1432-1438.
135. L. Luo, X. Wei and G.-Q. Chen, *Journal of Biomaterials Science. Polymer Edition*, 2009, **20**, 1537-1553.
136. L. Reyhaneh Ghavami, E. Biazar, A. S. Taleghani and S. H. Keshel, *Nano Biomed. Eng*, 2020, **12**, 14-20.
137. M. Zarei, S. Karbasi, F. Sari Aslani, S. Zare, O. Koochi-Hosseiniabad and N. Tanideh, *Journal of Dentistry (Shiraz, Iran)*, 2020, **21**, 18-30.
138. L. Medvecky, M. Giretova and R. Stulajterova, *Journal of Materials Science: Materials in Medicine*, 2014, **25**, 777-789.
139. G. Ma, D. Yang, K. Wang, J. Han, S. Ding, G. Song and J. Nie, *Journal of Applied Polymer Science*, 2010, **118**, 3619-3624.
140. N. Nagiah, L. Madhavi, R. Anitha, C. Anandan, N. T. Srinivasan and U. T. Sivagnanam, *Materials Science and Engineering: C*, 2013, **33**, 4444-4452.
141. C. Sanhueza, J. Hermosilla, A. Bugallo-Casal, A. Da Silva-Candal, C. Taboada, R. Millán, A. Concheiro, C. Alvarez-Lorenzo and F. Acevedo, *Materials Science & Engineering. C, Materials for Biological Applications*, 2021, **119**, 111602.
142. I. Chiulan, D. Mihaela Panaitescu, A. Nicoleta Frone, M. Teodorescu, C. Andi Nicolae, A. Cășărică, V. Tofan and A. Sălăgeanu, *Journal of Biomedical Materials Research Part A*, 2016, **104**, 2576-2584
143. C. Zhijiang, Y. Guang and J. Kim, *Current Applied Physics*, 2011, **11**, 247-249
144. C. Zhijiang, X. Yi, Y. Haizheng, J. Jia and Y. Liu, *Materials Science and Engineering: C*, 2016, **58**, 757-767
145. Z. Du, S. Jia, P. Xiong and Z. Cai, *International Journal of Polymeric Materials and Polymeric*



- Biomaterials*, 2022, **71**, 677-691.
146. E. R. A. C. Daisy, N. K. Rajendran, N. N. Houreld, N. Marraiki, A. M. Elgorban and M. Rajan, *Reactive and Functional Polymers*, 2020, **154**, 104671.
  147. A. S. Asran, K. Razghandi, N. Aggarwal, G. H. Michler and T. Groth, *Biomacromolecules*, 2010, **11**, 3413-3421.
  148. M. Zamanifard, M. T. Khorasani, M. Daliri and M. Parvazinia, *Journal of Biomaterials Science, Polymer Edition*, 2020, **31**, 1515-1537
  149. D. Sundaramurthi, U. M. Krishnan and S. Sethuraman, *Journal of Biomedical Nanotechnology*, 2013, **9**, 1383-1392.
  150. D. Sundaramurthi, U. M. Krishnan and S. Sethuraman, *Annals of Biomedical Engineering*, 2014, **42**, 2589-2599.
  151. H. S. Kim, J. Chen, L.-P. Wu, J. Wu, H. Xiang, K. W. Leong and J. Han, *Journal of tissue engineering*, 2020, **11**, 2041731420949332.
  152. B. Veleirinho, D. S. Coelho, P. F. Dias, M. Maraschin, R. M. Ribeiro-do-Valle and J. A. Lopes-da-Silva, *International Journal of Biological Macromolecules*, 2012, **51**, 343-350
  153. S. H. Keshel, E. Biazar, M. Rezaei Tavirani, M. Rahmati Roodsari, A. Ronaghi, M. Ebrahimi, H. Rad, A. Sahebalzamani, A. Rakhshan and K. Afsordeh, *Artificial Cells, Nanomedicine, and Biotechnology*, 2014, **42**, 210-216.
  154. I. Han, K. J. Shim, J. Y. Kim, S. U. Im, Y. K. Sung, M. Kim, I.-K. Kang and J. C. Kim, *Artificial Organs*, 2007, **31**, 801-808.
  155. R. Zine and M. Sinha, *Materials Science and Engineering: C*, 2017, **80**, 129-134.
  156. A. L. Rivera-Briso, F. L. Aachmann, V. Moreno-Manzano and Á. Serrano-Aroca, *International Journal of Biological Macromolecules*, 2020, **143**, 1000-1008
  157. A. D. Dalgic, E. Koman, A. Karatas, A. Tezcaner and D. Keskin, *Materials Science and Engineering: C*, 2021, 112554.
  158. N. Goonoo, F. Gimié, I. Ait-Arsa, C. Cordonin, J. Andries, D. Jhurry and A. Bhaw-Luximon, *Biomaterials Science*, 2021, **9**, 5259-5274.
  159. Y. Xu, H. Lu, C. Sun, L. Zou, H. Yin and W. Li, *Macromolecular Materials and Engineering*, 2020, **305**, 2000344.
  160. S. Vigneswari, V. Murugaiyah, G. Kaur, H. P. S. Abdul Khalil and A. A. Amirul, *Materials Science and Engineering: C*, 2016, **66**, 147-155
  161. W. Guo, X. Wang, C. Yang, R. Huang, H. Wang and Y. Zhao, *Materials Futures*, 2022, **1**, 015401.
  162. Y. Ji, X.-T. Li and G.-Q. Chen, *Biomaterials*, 2008, **29**, 3807-3814
  163. G. Peschel, H.-M. Dahse, A. Konrad, G. D. Wieland, P.-J. Mueller, D. P. Martin and M. Roth, *Journal of Biomedical Materials Research. Part A*, 2008, **85**, 1072-1081.
  164. B. Azimi, L. Thomas, A. Fusco, O. I. Kalaoglu-Altan, P. Basnett, P. Cinelli, K. De Clerck, I. Roy, G. Donnarumma and M.-B. Coltelli, *Journal of Functional Biomaterials*, 2020, **11**, 62.
  165. Y. He, Z. Hu, M. Ren, C. Ding, P. Chen, Q. Gu and Q. Wu, *Journal of Materials Science. Materials in Medicine*, 2014, **25**, 561-571.
  166. H. B. Mack, R. Mai, G. Lauer, F. Mack, T. Gedrange, R. Franke and T. Gredes, *Journal of physiology and pharmacology*, 2008, **59 Suppl 5**, 95-103.
  167. T. Gredes, A. Spassov, R. Mai, H. Mack, B. W. Loster, M. Mazurkiewicz-Janik, D. Kubein-Meesenburg, J. Fanghanel and T. Gedrange, *Journal of Physiology and Pharmacology: An*

- Official Journal of the Polish Physiological Society*, 2009, **60 Suppl 3**, 77-81.
168. L. Ricotti, A. Polini, G. G. Genchi, G. Ciofani, D. Iandolo, H. Vazão, V. Mattoli, L. Ferreira, A. Mencias and D. Pisignano, *Biomedical Materials (Bristol, England)*, 2012, **7**, 035010.
169. P. Kuppan, S. Sethuraman and U. M. Krishnan, *Journal of Biomaterials Science, Polymer Edition*, 2014, **25**, 574-593.
170. M.-R. Fan, M. Gong, L.-C. Da, L. Bai, X.-Q. Li, K.-F. Chen, J. Li-Ling, Z.-M. Yang and H.-Q. Xie, *Biomedical materials*, 2014, **9**, 015012.
171. P. N. Mohanna, R. C. Young, M. Wiberg and G. Terenghi, *Journal of Anatomy*, 2003, **203**, 553-565
172. L. N. Novikova, J. Pettersson, M. Brohlin, M. Wiberg and L. N. Novikov, *Biomaterials*, 2008, **29**, 1198-1206
173. A. Mosahebi, M. Wiberg and G. Terenghi, *Tissue Engineering*, 2003, **9**, 209-218
174. A. Hazari, M. Wiberg, G. Johansson-Rudén, C. Green and G. Terenghi, *British Journal of Plastic Surgery*, 1999, **52**, 653-657
175. R. C. Young, G. Terenghi and M. Wiberg, *British Journal of Plastic Surgery*, 2002, **55**, 235-240
176. S. J. Armstrong, M. Wiberg, G. Terenghi and P. J. Kingham, *Tissue Engineering*, 2007, **13**, 2863-2870
177. D. F. Kalbermatten, P. J. Kingham, D. Mahay, C. Mantovani, J. Pettersson, W. Raffoul, H. Balcin, G. Pierer and G. Terenghi, *Journal of Plastic, Reconstructive & Aesthetic Surgery*, 2008, **61**, 669-675.
178. P.-N. Mohanna, G. Terenghi and M. Wiberg, *Scandinavian Journal of Plastic and Reconstructive Surgery and Hand Surgery*, 2005, **39**, 129-137
179. L. N. Novikov, L. N. Novikova, A. Mosahebi, M. Wiberg, G. Terenghi and J.-O. Kellerth, *Biomaterials*, 2002, **23**, 3369-3376 %U <https://www.sciencedirect.com/science/article/pii/S0142961202000376>.
180. Y.-C. Kuo and C.-T. Wang, *Colloids and Surfaces B: Biointerfaces*, 2012, **100**, 9-15
181. W. H. Chen, B. L. Tang and Y. W. Tong, *13th International Conference on Biomedical Engineering*, 2009, 1208-1212
182. W. Chen and Y. W. Tong, *Acta Biomaterialia*, 2012, **8**, 540-548
183. M. P. Prabhakaran, E. Vatankhah and S. Ramakrishna, *Biotechnology and Bioengineering*, 2013, **110**, 2775-2784
184. E. Biazar and S. H. Keshel, *Asaio Journal*, 2013, **59**, 651-659.
185. Y.-Z. Bian, Y. Wang, G. Aibaidoula, G.-Q. Chen and Q. Wu, *Biomaterials*, 2009, **30**, 217-225
186. X.-Y. Xu, X.-T. Li, S.-W. Peng, J.-F. Xiao, C. Liu, G. Fang, K. C. Chen and G.-Q. Chen, *Biomaterials*, 2010, **31**, 3967-3975.
187. Y. Gao, L. Kong, L. Zhang, Y. Gong, G. Chen, N. Zhao and X. Zhang, *European Polymer Journal*, 2006, **42**, 764-775
188. Q. Liu, G. Liu, X. Liu, M. Yang, S. Xing, Y. Du and X. Xiong, *Applied Nanoscience*, 2020, **10**, 687-694.
189. L. Wang, Z.-H. Wang, C.-Y. Shen, M.-L. You, J.-F. Xiao and G.-Q. Chen, *Biomaterials*, 2010, **31**, 1691-1698
190. X. Mendibil, F. González-Pérez, X. Bazan, R. Díez-Ahedo, I. Quintana, F. J. Rodríguez, P. Basnett, R. Nigmatullin, B. Lukasiewicz and I. Roy, *ACS Biomaterials Science & Engineering*,

- 2021, **7**, 672-689.
191. E. Masaeli, P. A. Wieringa, M. Morshed, M. H. Nasr-Esfahani, S. Sadri, C. A. van Blitterswijk and L. Moroni, *Nanomedicine: nanotechnology, biology and medicine*, 2014, **10**, 1559-1569.
192. L. R. Lizarraga-Valderrama, G. Ronchi, R. Nigmatullin, F. Fregnan, P. Basnett, A. Paxinou, S. Geuna and I. Roy, *Bioengineering & translational medicine*, 2021, **6**, e10223.
193. L. R. Lizarraga-Valderrama, C. S. Taylor, F. Claeysens, J. W. Haycock, J. C. Knowles and I. Roy, *Journal of tissue engineering and regenerative medicine*, 2019, **13**, 1581-1594.
194. L. R. Lizarraga-Valderrama, R. Nigmatullin, B. Ladino, C. S. Taylor, A. R. Boccaccini, J. C. Knowles, F. Claeysens, J. W. Haycock and I. Roy, *Biomedical Materials*, 2020, **15**, 045024.
195. C. Stamm, A. Khosravi, N. Grabow, K. Schmohl, N. Treckmann, A. Drechsel, M. Nan, K.-P. Schmitz, A. Haubold and G. Steinhoff, *The Annals of Thoracic Surgery*, 2004, **78**, 2084-2093
196. D. Castellano, M. Blanes, B. Marco, I. Cerrada, A. Ruiz-Saurí, B. Pelacho, M. Arana, J. A. Montero, V. Cambra and F. Prosper, *Stem cells and development*, 2014, **23**, 1479-1490.
197. D. Wang, C. Wang, Z. Bi, B. Zhou, L. Wang, Q. Li and L.-S. Turng, *Available at SSRN 3974806*.
198. R. Sodian, S. P. Hoerstrup, J. S. Sperling, D. P. Martin, S. Daebritz, J. E. Mayer, Jr. and J. P. Vacanti, *ASAIO Journal*, 2000, **46**, 107-110
199. U. A. Stock, T. Sakamoto, S. Hatsuoka, D. P. Martin, M. Nagashima, A. M. Moran, M. A. Moses, P. N. Khalil, F. J. Schoen, J. P. Vacanti and J. E. Mayer, *The Journal of Thoracic and Cardiovascular Surgery*, 2000, **120**, 1158-1167.
200. S. P. Hoerstrup, R. Sodian, S. Daebritz, J. Wang, E. A. Bacha, D. P. Martin, A. M. Moran, K. J. Guleserian, J. S. Sperling, S. Kaushal, J. P. Vacanti, F. J. Schoen and J. E. Mayer, *Circulation*, 2000, **102**, Iii-44
201. K. Mendelson, E. Aikawa, B. A. Mettler, V. Sales, D. Martin, J. E. Mayer and F. J. Schoen, *Cardiovascular Pathology*, 2007, **16**, 277-282
202. I. Ortega, L. Dew, A. G. Kelly, C. K. Chong, S. MacNeil and F. Claeysens, *Biomaterials science*, 2015, **3**, 592-596.
203. L. V. Antonova, E. O. Krivkina, V. V. Sevostianova, A. V. Mironov, M. A. Rezvova, A. R. Shabaev, V. O. Tkachenko, S. S. Krutitskiy, M. Y. Khanova and T. Y. Sergeeva, *Polymers*, 2021, **13**, 2637.
204. L. Antonova, A. Y. Burago, A. Mironov, V. Matveeva, E. Velikanova, R. Mukhamadiyarov, T. Glushkova, Y. Kudryavtseva, O. Barbarash and L. Barbarash, 2015.
205. L. Antonova, V. Sevostyanova, A. Mironov, E. Krivkina, E. Velikanova, V. Matveeva, T. Glushkova and L. Barbarash, *Комплексные проблемы сердечно-сосудистых заболеваний*, 2018, **7**, 25-36.
206. L. V. Antonova, A. M. Seifalian, A. G. Kutikhin, V. V. Sevostyanova, V. G. Matveeva, E. A. Velikanova, A. V. Mironov, A. R. Shabaev, T. V. Glushkova and E. A. Senokosova, *International journal of molecular sciences*, 2016, **17**, 1920.
207. L. V. Antonova, A. V. Mironov, A. E. Yuzhalin, E. O. Krivkina, A. R. Shabaev, M. A. Rezvova, V. O. Tkachenko, M. Y. Khanova, T. Y. Sergeeva and S. S. Krutitskiy, *Pharmaceuticals*, 2020, **13**, 101.
208. V. V. Sevostianova, L. V. Antonova, A. V. Mironov, A. E. Yuzhalin, V. N. Silnikov, T. V. Glushkova, T. S. Godovikova, E. O. Krivkina, E. Bolbasov and T. N. Akentyeva, *ACS omega*, 2020, **5**, 21700-21711.
209. V. V. Sevostianova, A. Mironov, L. Antonova, E. Krivkina, V. Matveeva, E. Velikanova, T.

- Glushkova, T. Akentyeva and L. S. Barbarash.
210. S. Wu, Y. Liu, B. Cui, Y. Tang, Q. Wang, X. Qu and G. Chen, *Sheng Wu Gong Cheng Xue Bao = Chinese Journal of Biotechnology*, 2008, **24**, 610-616.
211. J. Gao, Z. Huang, H. Guo, S. Tian, L. Wang and Y. Li, *Fibers and Polymers*, 2019, **20**, 2261-2267.
212. J. Gao, H. Guo, S. Tian, Y. Qiao, J. Han, Y. Li and L. Wang, *International Journal of Polymeric Materials and Polymeric Biomaterials*, 2019, **68**, 575-581.
213. H.-X. Yang, M. Sun, Y. Zhang and P. Zhou, *ISRN Materials Science*, 2011, **2011**, e389872
214. S. Wu, Y. L. Liu, B. Cui, X. H. Qu and G. Q. Chen, *Artificial Organs*, 2007, **31**, 689-697.
215. X.-H. Qu, Q. Wu, J. Liang, X. Qu, S.-G. Wang and G.-Q. Chen, *Biomaterials*, 2005, **26**, 6991-7001.
216. S.-T. Cheng, Z.-F. Chen and G.-Q. Chen, *Biomaterials*, 2008, **29**, 4187-4194.
217. Y. Jian and Y. Zhu, *Polymers*, 2022, **14**, 994.
218. R. Sodian, S. P. Hoerstrup, J. S. Sperling, S. Daebritz, D. P. Martin, A. M. Moran, B. S. Kim, F. J. Schoen, J. P. Vacanti and J. E. Mayer, *Circulation*, 2000, **102**, Iii-22.
219. A. V. Bagdadi, University of Westminster, 2013.
220. D. Shum-Tim, U. Stock, J. Hrkach, T. Shinoka, J. Lien, M. A. Moses, A. Stamp, G. Taylor, A. M. Moran, W. Landis, R. Langer, J. P. Vacanti and J. E. Mayer, *The Annals of Thoracic Surgery*, 1999, **68**, 2298-2304
221. C.-L. Yao, J.-H. Chen and C.-H. Lee, *Journal of Polymer Research*, 2018, **25**, 1-14.
222. X.-H. Qu, Q. Wu and G.-Q. Chen, *Journal of Biomaterials Science, Polymer Edition*, 2006, **17**, 1107-1121.
223. G. Adamus, W. Sikorska, H. Janeczek, M. Kwiecień, M. Sobota and M. Kowalczyk, *European Polymer Journal*, 2012, **48**, 621-631.
224. P. Dubey, University of Westminster, 2017.
225. C. Constantinides, P. Basnett, B. Lukaszewicz, R. Carnicer, E. Swider, Q. A. Majid, M. Srinivas, C. A. Carr and I. Roy, *ACS applied materials & interfaces*, 2018, **10**, 25056-25068.
226. R. Sodian, J. S. Sperling, D. P. Martin, A. Egozy, U. Stock, J. E. Mayer and J. P. Vacanti, *Tissue Engineering*, 2000, **6**, 183-188
227. R. Sodian, S. P. Hoerstrup, J. S. Sperling, S. H. Daebritz, D. P. Martin, F. J. Schoen, J. P. Vacanti and J. E. Mayer, *The Annals of Thoracic Surgery*, 2000, **70**, 140-144
228. X. H. Zhu, C. H. Wang and Y. W. Tong, *Journal of Biomedical Materials Research Part B: Applied Biomaterials*, 2007, **82**, 7-16.
229. X. H. Zhu, C. H. Wang and Y. W. Tong, *Journal of Biomedical Materials Research Part A: An Official Journal of The Society for Biomaterials, The Japanese Society for Biomaterials, and The Australian Society for Biomaterials and the Korean Society for Biomaterials*, 2009, **89**, 411-423.
230. Z. Su, P. Li, B. Wu, H. Ma, Y. Wang, G. Liu, H. Zeng, Z. Li and X. Wei, *Materials Science and Engineering: C*, 2014, **45**, 374-382.
231. W. R. Webb, T. P. Dale, A. J. Lomas, G. Zeng, I. Wimpenny, A. J. El Haj, N. R. Forsyth and G.-Q. Chen, *Biomaterials*, 2013, **34**, 6683-6694.
232. S. Rathbone, P. Furrer, J. Lübben, M. Zinn and S. Cartmell, *Journal of Biomedical Materials Research Part A: An Official Journal of The Society for Biomaterials, The Japanese Society for Biomaterials, and The Australian Society for Biomaterials and the Korean Society for*

- Biomaterials*, 2010, **93**, 1391-1403.
233. S. Wang, M. Wang, Y. Liu, D. Hu, L. Gu, X. Fei and J. Zhang, *Ocular Immunology and Inflammation*, 2019, **27**, 1357-1364.
234. J. Zhou, S.-W. Peng, Y.-Y. Wang, S.-B. Zheng, Y. Wang and G.-Q. Chen, *Biomaterials*, 2010, **31**, 7512-7518.
235. K. Xue, Z. Liu, L. Jiang, D. Kai, Z. Li, X. Su and X. J. Loh, *Biomaterials Science*, 2020, **8**, 926-936
